# Supplementary material for: Serum and brain natural copper stable isotopes in a mouse model of Alzheimer’s disease
Source: PubMed Central journal article supplement (PMC6695409; doi:10.1038/s41598-019-47790-5), 2019-08-15
Supplement: 41598_2019_47790_MOESM1_ESM.pdf [file 41598_2019_47790_MOESM1_ESM.pdf]

# **Serum and brain natural copper stable isotopes in a mouse model of Alzheimer's disease**

Frédéric Moynier<sup>1,2</sup>, John Creech<sup>1</sup>, Jessica Dallas<sup>1</sup>, and Marie Le Borgne<sup>3</sup>

<sup>1</sup>Institut de Physique du Globe de Paris, Université de Paris, CNRS, 1 rue Jussieu 75238 Paris cedex 05 France

<sup>2</sup>Institut Universitaire de France, 75005, Paris, France

<sup>3</sup>Unité 1148, Institut National de la Santé et de la Recherche Médicale (INSERM), Hôpital Xavier Bichat, Paris, France; Université Paris Diderot, Sorbonne Paris Cité, Paris, France; Département Hospitalo-Universitaire DHU FIRE, Paris, France

Corresponding author: Frédéric Moynier, [moynier@ipgp.fr](mailto:moynier@ipgp.fr)

Other authors email addresses:

[john@isospike.org](mailto:john@isospike.org)

[dallas@ipgp.fr](mailto:dallas@ipgp.fr)

[marie.le-borgne-moynier@inserm.fr](mailto:marie.le-borgne-moynier@inserm.fr)

| Mouse ID | Genotype | Sex    | 3 months - Serum                               |       |   | 6 months - Serum                               |       |   | 9 months - Serum                               |       |   | 12 months - Serum                              |       |   | 12 months - Brain                              |       |   |
|----------|----------|--------|------------------------------------------------|-------|---|------------------------------------------------|-------|---|------------------------------------------------|-------|---|------------------------------------------------|-------|---|------------------------------------------------|-------|---|
|          |          |        | $\delta^{65}\text{Cu}$<br>(vs NIST<br>SRM-976) | $\pm$ | n | $\delta^{65}\text{Cu}$<br>(vs NIST<br>SRM-976) | $\pm$ | n | $\delta^{65}\text{Cu}$<br>(vs NIST<br>SRM-976) | $\pm$ | n | $\delta^{65}\text{Cu}$<br>(vs NIST<br>SRM-976) | $\pm$ | n | $\delta^{65}\text{Cu}$<br>(vs NIST<br>SRM-976) | $\pm$ | n |
| 10       | WT       | female | -0.63                                          | 0.03  | 1 | -0.63                                          | 0.03  | 1 | -0.33                                          | 0.03  | 1 | -0.57                                          | 0.03  | 3 | 0.28                                           | 0.00  | 3 |
| 13       | WT       | female | -0.58                                          | 0.02  | 1 | -0.51                                          | 0.04  | 1 | -0.56                                          | 0.03  | 1 | -0.38                                          | 0.04  | 2 |                                                |       |   |
| 14       | WT       | female | -0.56                                          | 0.02  | 1 | -0.36                                          | 0.04  | 1 | -0.31                                          | 0.02  | 1 | -0.16                                          | 0.02  | 2 | 0.83                                           | 0.03  | 3 |
| 16       | WT       | female | -0.35                                          | 0.02  | 1 | -0.16                                          | 0.05  | 1 | -0.61                                          | 0.03  | 1 | -0.08                                          | 0.12  | 2 | 0.83                                           | 0.04  | 1 |
| 29       | WT       | female | -0.47                                          | 0.07  | 1 | -0.74                                          | 0.03  | 1 | -0.87                                          | 0.02  | 1 | -0.38                                          | 0.05  | 2 | 0.56                                           | 0.03  | 1 |
| 2        | WT       | male   | -0.90                                          | 0.02  | 1 | -0.75                                          | 0.09  | 2 | -0.82                                          | 0.03  | 1 |                                                |       |   |                                                |       |   |
| 4        | WT       | male   | -1.02                                          | 0.02  | 1 | -0.81                                          | 0.03  | 1 | -0.81                                          | 0.02  | 1 |                                                |       |   |                                                |       |   |
| 21       | WT       | male   | -0.84                                          | 0.03  | 1 | -1.02                                          | 0.04  | 1 | -0.97                                          | 0.03  | 1 |                                                |       |   |                                                |       |   |
| 24       | WT       | male   | -0.83                                          | 0.02  | 1 | -0.41                                          | 0.04  | 1 |                                                |       |   |                                                |       |   |                                                |       |   |
| 26       | WT       | male   |                                                |       |   | -0.72                                          | 0.03  | 1 | -0.97                                          | 0.04  | 1 |                                                |       |   |                                                |       |   |
| 9        | AD       | female | -0.83                                          | 0.03  | 1 | -0.86                                          | 0.01  | 1 | -0.81                                          | 0.04  | 1 | -0.79                                          | 0.00  | 2 | 0.26                                           | 0.05  | 3 |
| 11       | AD       | female |                                                |       |   | -0.37                                          | 0.05  | 1 | -0.27                                          | 0.02  | 1 | -0.22                                          | 0.04  | 2 |                                                |       |   |
| 12       | AD       | female | -0.37                                          | 0.02  | 1 | -0.34                                          | 0.05  | 1 |                                                |       |   | -0.39                                          | 0.23  | 2 | 0.65                                           | 0.04  | 3 |
| 15       | AD       | female | -0.58                                          | 0.03  | 1 | -0.38                                          | 0.04  | 1 | -0.68                                          | 0.03  | 1 | -0.67                                          | 0.02  | 1 | 0.59                                           | 0.03  | 1 |
| 17       | AD       | female | -0.51                                          | 0.02  | 1 | -0.65                                          | 0.03  | 1 | -0.76                                          | 0.03  | 1 |                                                |       |   | 0.53                                           | 0.06  | 1 |
| 31       | AD       | female | -0.17                                          | 0.02  | 1 | -0.58                                          | 0.02  | 1 |                                                |       |   | -0.89                                          | 0.14  | 2 | 0.51                                           | 0.01  | 1 |
| 1        | AD       | male   | -0.85                                          | 0.03  | 1 | -0.76                                          | 0.07  | 2 | -0.72                                          | 0.05  | 1 |                                                |       |   |                                                |       |   |
| 3        | AD       | male   | -0.82                                          | 0.04  | 1 | -0.77                                          | 0.02  | 1 | -0.68                                          | 0.03  | 1 |                                                |       |   |                                                |       |   |
| 5        | AD       | male   | -1.04                                          | 0.02  | 1 | -0.67                                          | 0.02  | 1 | -0.46                                          | 0.04  | 1 |                                                |       |   |                                                |       |   |
| 6        | AD       | male   |                                                |       |   | -0.76                                          | 0.03  | 1 | -0.59                                          | 0.02  | 1 | -0.70                                          | 0.02  | 1 |                                                |       |   |
| 7        | AD       | male   |                                                |       |   | -0.76                                          | 0.03  | 1 | -0.54                                          | 0.04  | 1 | -0.70                                          | 0.01  | 2 |                                                |       |   |
| 20       | AD       | male   | -0.79                                          | 0.02  | 1 | -0.76                                          | 0.04  | 1 | -0.98                                          | 0.02  | 1 | -0.56                                          | 0.08  | 2 |                                                |       |   |
| 25       | AD       | male   | -0.41                                          | 0.02  | 1 | -0.81                                          | 0.03  | 1 | -0.91                                          | 0.03  | 1 |                                                |       |   |                                                |       |   |

Table S1. Copper isotopic composition of brain and serum samples.

n=number of measurements. WT=wild type mice, AD=APP<sup>swe</sup>/PSEN1<sup>dE9</sup> mice.
